# Supplementary material for: Reclaimed Salt-Affected Soils Can Effectively Contribute to Carbon Sequestration and Food Grain Production: Evidence from Pakistan
Source: MDPI journal article supplement (doi:10.3390/app13031436), 2023-01-21
Supplement: s1 [file s1]

# RECLAIMED SALT-AFFECTED SOILS CAN EFFECTIVELY CONTRIBUTE TO CARBON SEQUESTRATION AND FOOD GRAIN PRODUCTION: EVIDENCE FROM PAKISTAN

Zia Ur Rahman Farooqi<sup>\*1,3</sup>, Muhammad Sabir<sup>1</sup>, Hamaad Raza Ahmad<sup>1</sup>, Muhammad Shahbaz<sup>2</sup>, Jo Smith<sup>3\*</sup>

<sup>1</sup>Institute of Soil and Environmental Sciences, University of Agriculture Faisalabad-38040, Pakistan

<sup>2</sup>Department of Botany, Faculty of Sciences, University of Agriculture Faisalabad-38040, Pakistan

<sup>3</sup>Institute of Biological and Environmental Sciences, School of Biological Sciences, University of Aberdeen, 23 St Machar Drive, AB24 3UU, Scotland, UK.

**\*Corresponding author:** ziaa2600@gmail.com; jo.smith@abdn.ac.uk

Table S1: Physicochemical properties of organic amendments used in experiment.

| <b>Properties</b> | <b>Farmyard manure</b> | <b>Poultry manure</b> | <b>Green manure</b> |
|-------------------|------------------------|-----------------------|---------------------|
| pH                | 7.8±0.3                | 7.0±0.5               | -                   |
| Total C (%)       | 11±2                   | 23±2                  | 9.8±0.8             |
| Total N (%)       | 0.8±0.2                | 7±1                   | 2.5±0.6             |
| Total P (%)       | 0.4±0.2                | 2±1                   | 0.6±0.3             |
| Total K (%)       | 1.20±0.03              | 2.5±0.7               | 1.8±0.8             |

Table S2: Crop management practices during the study period.

| <b>Crop</b>                              | <b>Wheat</b>                      | <b>Maize</b>                     |
|------------------------------------------|-----------------------------------|----------------------------------|
| Seed rates (kg ha <sup>-1</sup> )        | 150                               | 50                               |
| Fertilizers (NPK @ kg ha <sup>-1</sup> ) | 79:57:62                          | 135:63:50                        |
| Irrigation (mm)                          | 550 (110 each), 15 days intervals | 650 (130 each) 15 days intervals |
| Amendments (t ha <sup>-1</sup> )         | 12.00                             | 12.00                            |
| Tillage                                  | No                                | No                               |
| Cropping system                          | Wheat-maize                       | Wheat-maize                      |
| Planting method                          | Beds                              | Ridges                           |
| Sowing method                            | Broadcasting                      | Drilling                         |
| Sowing date                              | 12-12-17 to 20-11-19              | 15-07-18 to 15-06-2020           |
| Harvest dates                            | 02-05-18 to 24-04-2020            | 21-10-2018 to 19-10-2020         |

Table S3: Soil physico-chemical properties used in the initialization of simulations at Dijkot, Uchkera and Jhang.

| <b>Property</b>                    | <b>Dijkot</b> | <b>Uchkera</b> | <b>Jhang</b> |
|------------------------------------|---------------|----------------|--------------|
| Soil thickness (cm)                | 30            | 30             | 30           |
| Sand (%)                           | 48            | 45             | 62           |
| Silt (%)                           | 33            | 25             | 21           |
| Clay (%)                           | 19            | 30             | 17           |
| pH                                 | 9.45          | 9.36           | 9.50         |
| EC (d S m <sup>-1</sup> )          | 5.14          | 5.28           | 5.38         |
| SOC (%)                            | 0.14          | 0.11           | 0.18         |
| Bulk density (g cm <sup>-3</sup> ) | 1.67          | 1.75           | 1.65         |

Table S4: Crop yields for the control and treatments used in the simulations of pot experiments at Dijkot, Uchkera and Jhang, and field experiment at Jhang. Note: FYM = farmyard manure, PM = poultry manure, GM = green manure (all applied at 12 t ha<sup>-1</sup>); G100 = 100% soil gypsum requirement; G50 = 50% soil gypsum requirement.

| Treatment           | Crop yield (t ha <sup>-1</sup> ) after harvest of |               |               |               |               |               |
|---------------------|---------------------------------------------------|---------------|---------------|---------------|---------------|---------------|
|                     | Wheat<br>2018                                     | Maize<br>2018 | Wheat<br>2019 | Maize<br>2019 | Wheat<br>2020 | Maize<br>2020 |
| Pot study – Dijkot  |                                                   |               |               |               |               |               |
| Control             | 1.68                                              | 3.91          | 1.79          | 3.99          | 2.14          | 4.03          |
| FYM+G50             | 2.60                                              | 5.41          | 2.71          | 5.49          | 3.06          | 5.53          |
| PM+G50              | 2.68                                              | 5.60          | 2.79          | 5.67          | 3.14          | 5.71          |
| GM+G50              | 2.51                                              | 5.36          | 2.62          | 5.43          | 2.97          | 5.47          |
| Pot study – Uchkera |                                                   |               |               |               |               |               |
| Control             | 2.17                                              | 4.17          | 2.52          | 4.23          | 2.39          | 4.25          |
| FYM+G50             | 2.76                                              | 5.59          | 3.11          | 5.65          | 2.99          | 5.67          |
| PM+G50              | 2.38                                              | 5.16          | 2.74          | 5.21          | 2.62          | 5.24          |
| GM+G50              | 2.40                                              | 5.44          | 2.75          | 5.49          | 2.63          | 5.52          |
| Pot study – Jhang   |                                                   |               |               |               |               |               |
| Control             | 1.84                                              | 3.42          | 2.36          | 3.46          | 2.31          | 3.52          |
| G100                | 2.46                                              | 4.96          | 2.98          | 5.00          | 2.93          | 5.07          |
| FYM+G50             | 2.77                                              | 5.88          | 3.29          | 5.92          | 3.24          | 5.98          |
| PM+G50              | 2.63                                              | 5.31          | 3.15          | 5.35          | 3.10          | 5.41          |
| GM+G50              | 2.69                                              | 5.36          | 3.22          | 5.40          | 2.98          | 5.46          |
| Field study – Jhang |                                                   |               |               |               |               |               |
| Control             | 2.05                                              | 3.31          | 2.23          | 3.52          | 2.35          | 3.62          |
| G100                | 2.87                                              | 4.39          | 3.11          | 4.47          | 3.33          | 4.83          |
| FYM+G50             | 3.16                                              | 4.52          | 3.41          | 4.64          | 3.57          | 4.90          |
| PM+G50              | 2.96                                              | 4.45          | 3.25          | 4.40          | 3.42          | 4.85          |
| GM+G50              | 2.86                                              | 4.68          | 3.14          | 4.91          | 3.32          | 5.39          |

Table S5: The soil C measurements to a soil depth of 30 cm for the control and treatments used (a) to adjust the plant inputs (control) and (b) to evaluate the model (other treatments). Note: FYM = farmyard manure, PM = poultry manure, GM = green manure (all applied at 12 t ha<sup>-1</sup>); G100 = 100% soil gypsum requirement; G50 = 50% soil gypsum requirement.

| Site and Treatment  | Measured soil carbon (t ha <sup>-1</sup> ) after harvest of |            |            |            |            |            |
|---------------------|-------------------------------------------------------------|------------|------------|------------|------------|------------|
|                     | Wheat 2018                                                  | Maize 2018 | Wheat 2019 | Maize 2019 | Wheat 2020 | Maize 2020 |
| Pot study – Dijkot  |                                                             |            |            |            |            |            |
| Control             | 8.0                                                         | 8.5        | 9          | 9.5        | 9.5        | 10         |
| FYM+G50             | 9.5                                                         | 12         | 13.5       | 14.5       | 16         | 17.5       |
| PM+G50              | 11                                                          | 12.5       | 13         | 14         | 15.5       | 17         |
| GM+G50              | 10                                                          | 11         | 11.5       | 12         | 12.5       | 13         |
| Pot study – Uchkera |                                                             |            |            |            |            |            |
| Control             | 7.4                                                         | 7.9        | 7.9        | 8.4        | 9.5        | 10         |
| FYM+G50             | 10.5                                                        | 12.1       | 13.1       | 14.2       | 15.2       | 15.8       |
| PM+G50              | 10.5                                                        | 11         | 13.1       | 14.2       | 14.2       | 14.7       |
| GM+G50              | 8.9                                                         | 10         | 11         | 12.1       | 12.1       | 12.6       |
| Pot study – Jhang   |                                                             |            |            |            |            |            |
| Control             | 9.9                                                         | 9.9        | 9.9        | 10.4       | 10.9       | 9.9        |
| G100                | 13.4                                                        | 15.8       | 16.8       | 17.3       | 18.3       | 18.8       |
| FYM+G50             | 15.3                                                        | 15.8       | 17.8       | 19.3       | 21.3       | 23.3       |
| PM+G50              | 14.4                                                        | 14.4       | 14.9       | 15.3       | 16.3       | 16.3       |
| GM+G50              | 12.9                                                        | 13.4       | 14.9       | 15.3       | 15.3       | 16.3       |
| Field study – Jhang |                                                             |            |            |            |            |            |
| Control             | 9.4                                                         | 9.4        | 9.9        | 11.4       | 11.9       | 12.9       |
| G100                | 11.4                                                        | 12.4       | 13.4       | 14.9       | 15.3       | 16.8       |
| FYM+G50             | 13.9                                                        | 15.3       | 16.3       | 17.8       | 19.3       | 22.3       |
| PM+G50              | 12.9                                                        | 13.9       | 14.9       | 16.3       | 17.3       | 18.8       |
| GM+G50              | 11.9                                                        | 13.4       | 14.4       | 15.8       | 16.3       | 16.3       |



## Supplementary figures

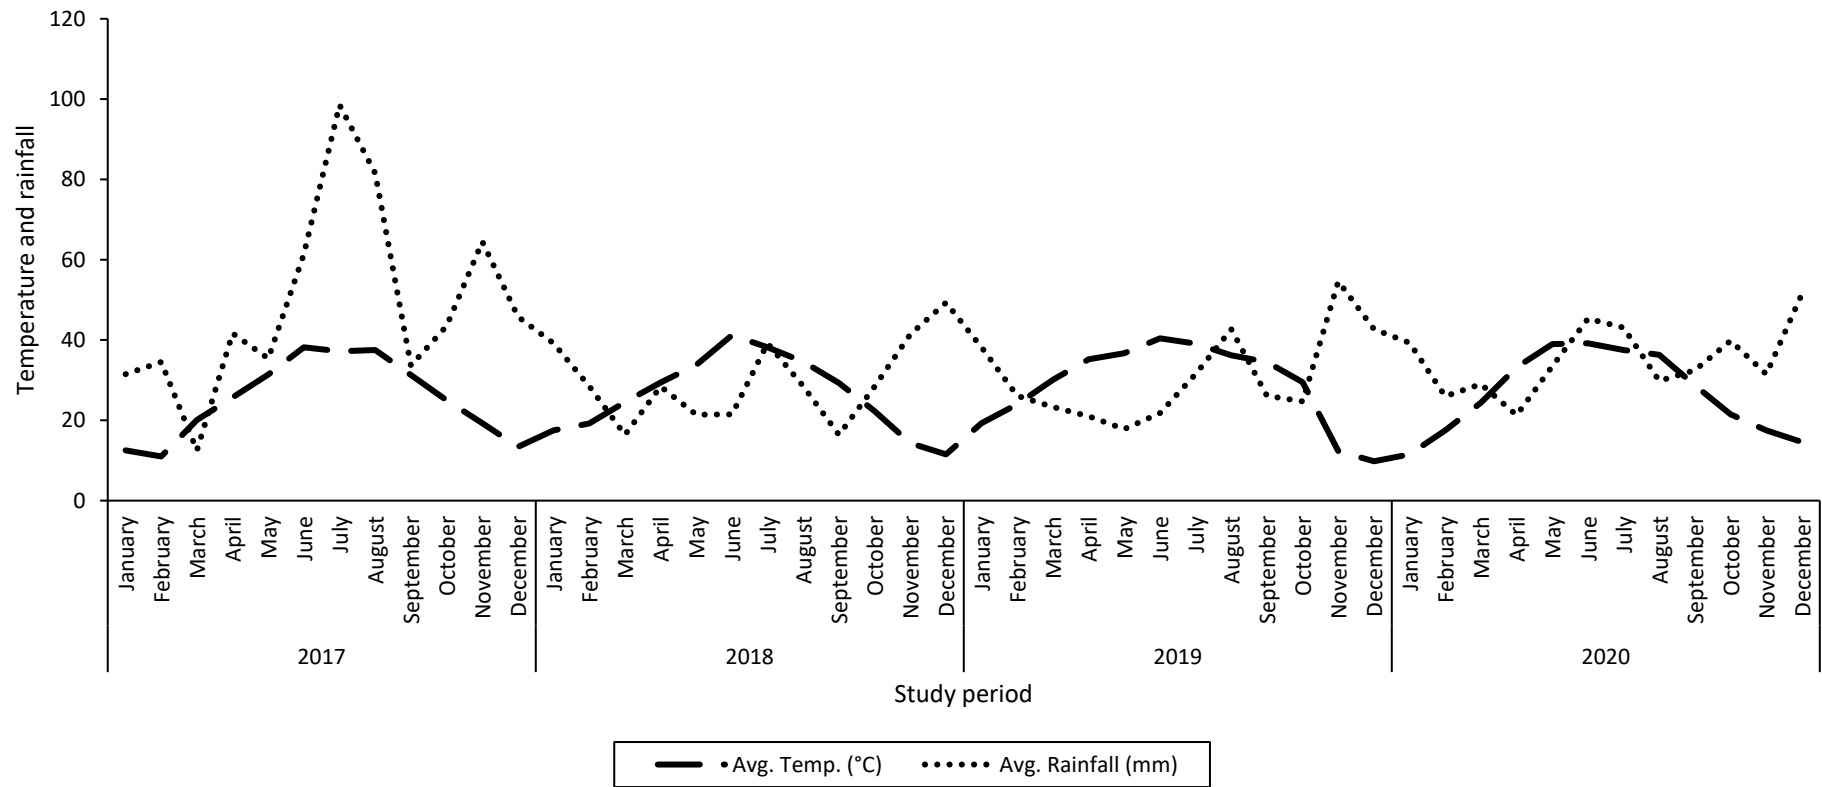

Fig. S1 Monthly average temperature and rainfall during the study period.



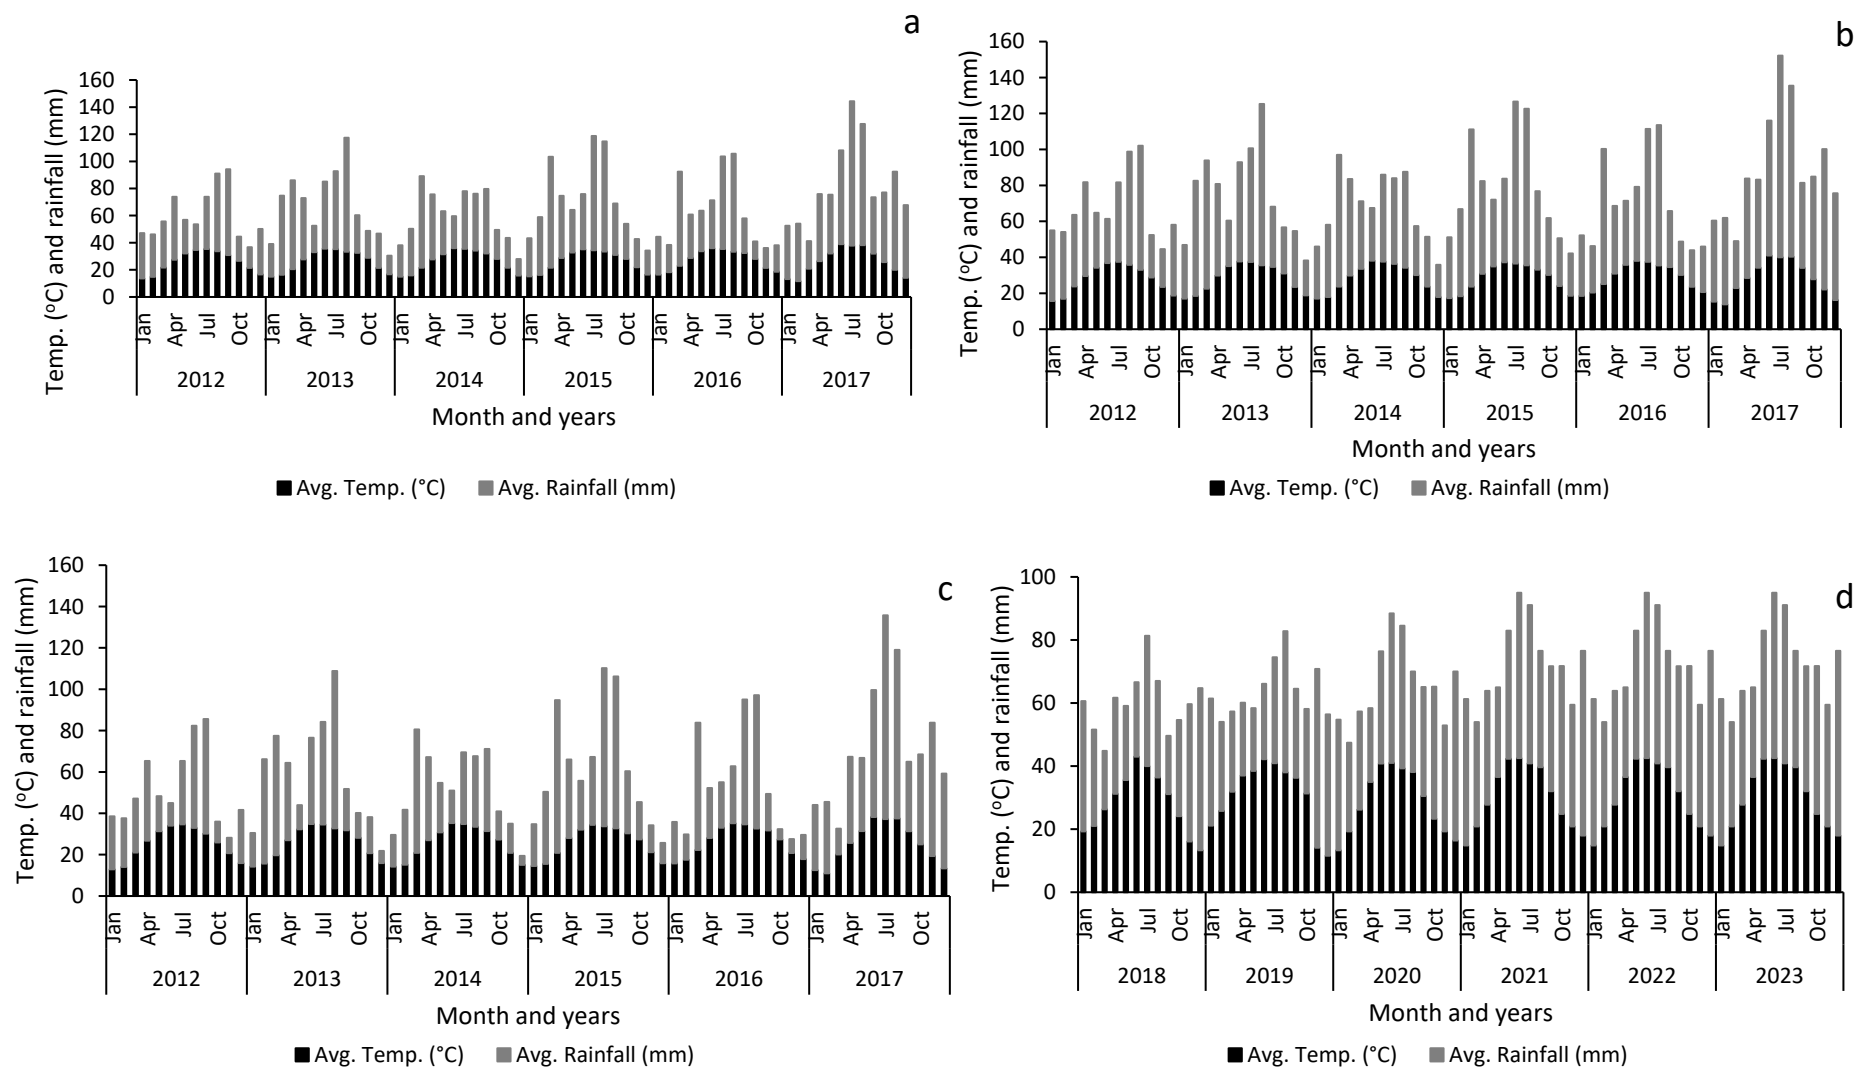

Fig. S2 The weather data used in the simulation of the pot experiment soils, a) for steady-state run in Dijkot, b) in Uchkera, c) in Jhang, and d) for forward run in Faisalabad.

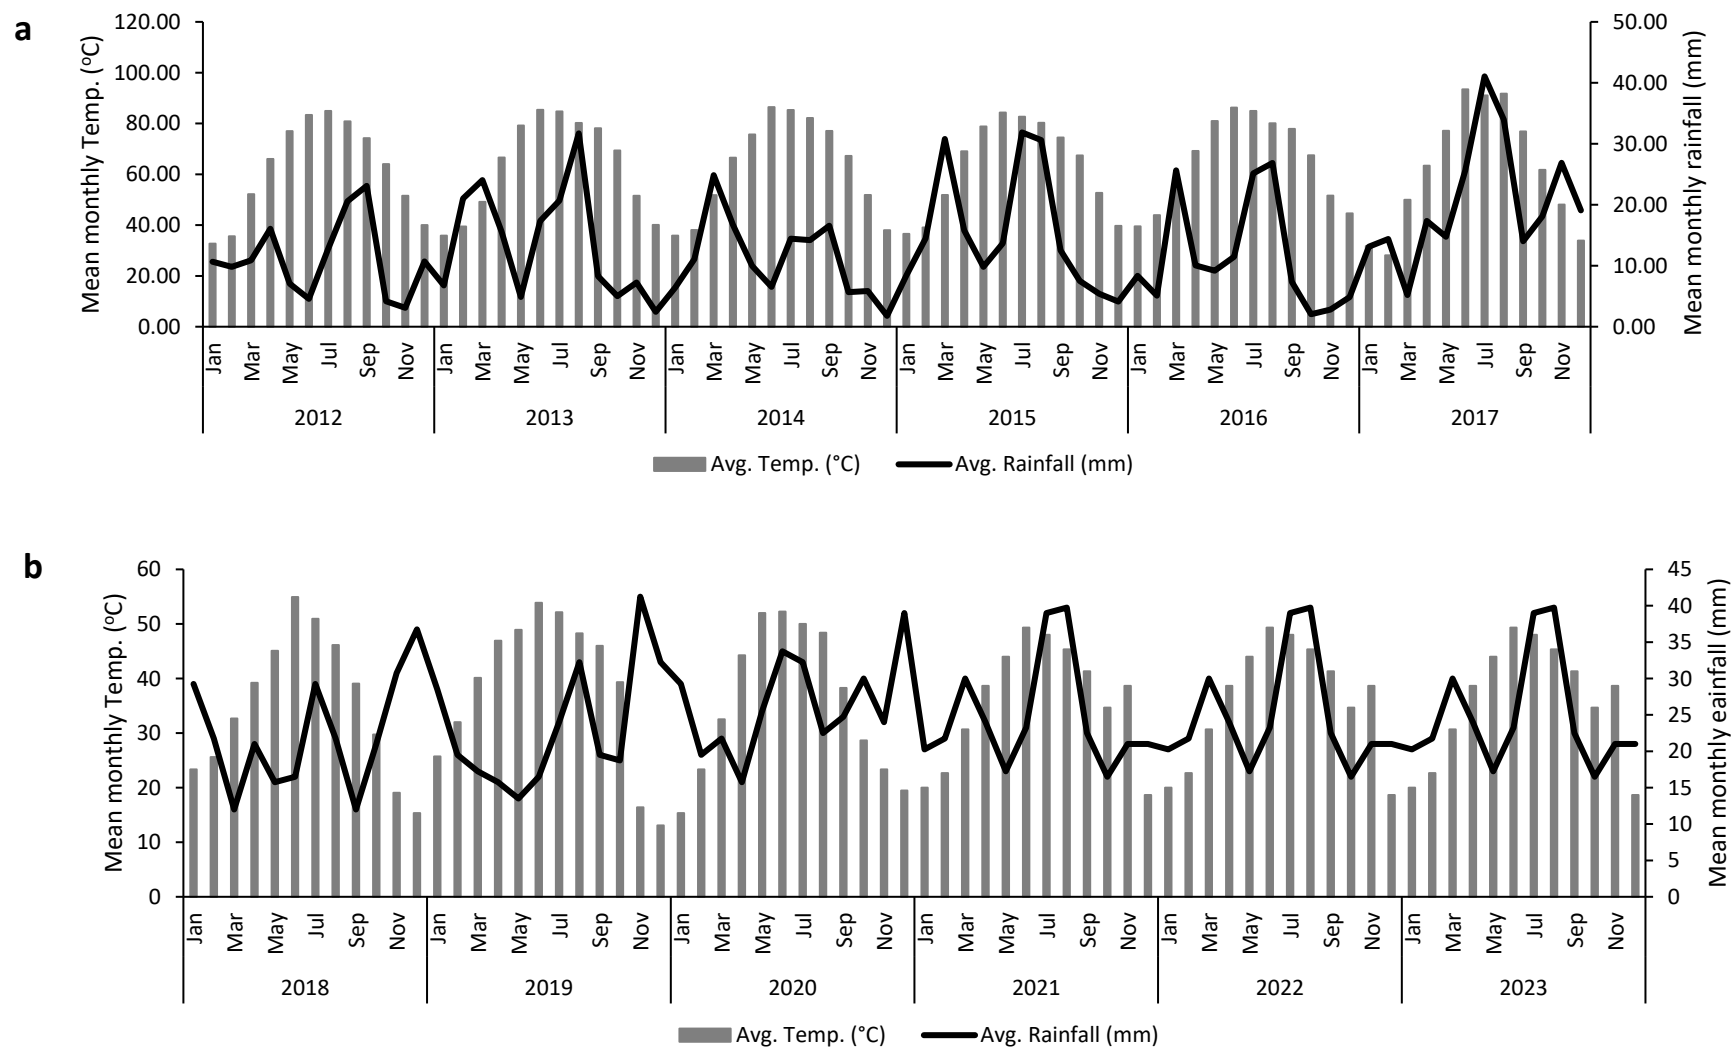

Fig. S3 The weather data used in the simulations of the field experiment (Jhang) soils, a) steady-state run, and b) forward run.
